# Supplementary material for: Theaflavin-3,3′-di-gallate represses prostate cancer by activating the PKCδ/aSMase signaling pathway through a 67 kDa laminin receptor
Source: Royal Society of Chemistry journal article supplement (doi:10.1039/d1fo04198c), 2022-01-01
Supplement: d1fo04198c1.pdf [file d1fo04198c1.pdf]

**Theaflavin-3,3'-di-gallate represses prostate cancer by  
activating the PKC $\delta$ /aSMase signaling pathway through a 67  
kDa laminin receptor**

Lingli Sun, Shuai Wen, Qiuhua Li, Xingfei Lai, Ruohong Chen, Zhenbiao Zhang, Junxi  
Cao, Shili Sun\*

*Tea Research Institute, Guangdong Academy of Agricultural Sciences / Guangdong  
Provincial Key Laboratory of Tea Plant Resources Innovation & Utilization, Guangzhou  
510640, China*

# Supplementary materials

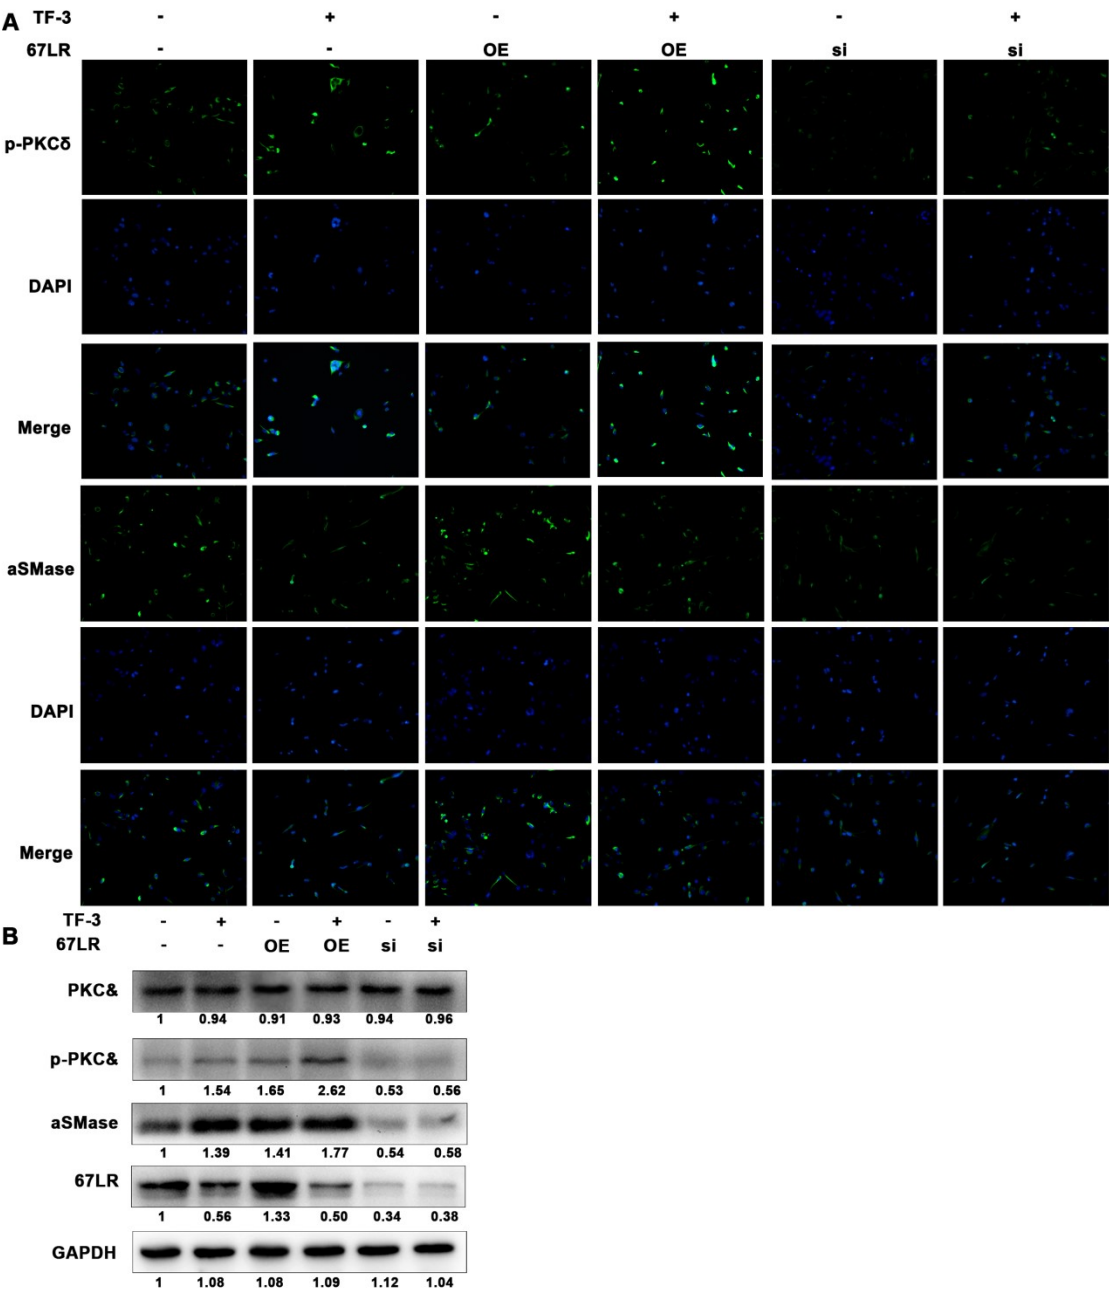

**Figure S1. The mediating role of 67LR in TF-3 inducing PC-3 apoptosis.**

**A.** Immunofluorescence assay was used to detect the expression of p-PKCδ and aSMase proteins in cell lines with different expression levels of 67LR, in order to clarify the mediating role of 67LR in TF-3 inducing PC-3 apoptosis. **B.** Western blot assay was used to detect the expression of p-PKCδ/PKCδ and aSMase proteins in cell lines with different expression levels of 67LR, in order to clarify the mediating role of 67LR in TF-3

inducing PC-3 apoptosis.
